# Supplementary material for: GOntoSim: a semantic similarity measure based on LCA and common descendants
Source: PubMed Central journal article supplement (PMC8907294; doi:10.1038/s41598-022-07624-3), 2022-03-09
Supplement: 41598_2022_7624_MOESM1_ESM.pdf [file 41598_2022_7624_MOESM1_ESM.pdf]

## Supplementary Information

### Abbreviations

- GO: Gene Ontology;
- BP: Biological Process;
- CC: Cellular Component;
- MF: Molecular Function;
- DAG: Directed Acyclic Graph;
- EC: Enzyme Commission;
- IC: Information Content;
- LCA: Lowest Common Ancestor;
- MICA: Most Informative Common Ancestor;
- IEA: Inferred from Electronic Annotation;
- LFC: Logged Fold Change;
- BMA: Best Match Average;
- SSM: Semantic Similarity Measure;
- SGD: Saccharomyces Genome Database;
- PPI: Protein-Protein Interaction;
- RWR: Random Walk with Restart;
- SVD: Singular Value Decomposition;
- DO: Disease Ontology;

### Evaluation Metrics

- Purity is a measure of the extent to which clusters contain a single class.

$$Purity = \frac{1}{N} \sum_{m \in D} \max_{d \in D} |m \cap d| \quad (1)$$

- Adjusted Rand index Score measures the similarity of the two assignments, ignoring permutations and with chance normalization. If  $C$  is a ground truth class assignment and  $K$  the clustering,  $a$  the number of pairs of elements that are in the same set in  $C$  and in the same set in  $K$   $b$ , the number of pairs of elements that are in different sets in  $C$  and in different sets in  $K$

The unadjusted Rand index is then given by:

$$RI = \frac{a + b}{C_2^{n_{samples}}} \quad (2)$$

where  $C_2^{n_{samples}}$  is the total number of possible pairs in the dataset. It does not matter if the calculation is performed on ordered pairs or unordered pairs as long as the calculation is performed consistently.

However, the Rand index does not guarantee that random label assignments will get a value close to zero (esp. if the number of clusters is in the same order of magnitude as the number of samples). To counter this effect we can discount the expected RI  $E[RI]$  of random labelings by defining the adjusted Rand index as follows:

$$ARI = \frac{RI - E[RI]}{\max(RI) - E[RI]} \quad (3)$$

- Fowlkes-Mallows score is the Geometric Mean between Precision and Recall.

$$FMI = \frac{TP}{\sqrt{(TP + FP)(TP + FN)}} \quad (4)$$

Here,

- True Positive: the number of pair of points belonging to the same clusters in true as well as predicted labels both.
  - False Positive: number of pair of points belonging to the same clusters in true labels but not in the predicted labels.
  - False Negative: number of pair of points belonging to the same clusters in the predicted labels but not in the true labels.
- Adjusted Mutual information-based score Measures the agreement of the two assignments, ignoring permutations, and is adjusted to account for chance.

$$MI(U, V) = \sum_{i=1}^{|U|} \sum_{j=1}^{|V|} \frac{|U_i \cap V_j|}{N} \log \left( \frac{N|U_i \cap V_j|}{|U_i||V_j|} \right) \quad (5)$$

$$H(U) = - \sum_{i=1}^{|U|} P(i) \log(P(i)) \quad (6)$$

$$H(V) = - \sum_{j=1}^{|V|} P'(j) \log(P'(j)) \quad (7)$$

$$NMI(U, V) = \frac{MI(U, V)}{\text{mean}(H(U), H(V))} \quad (8)$$

$$MI(U, V) = \sum_{i=1}^{|U|} \sum_{j=1}^{|V|} P(i, j) \log \left( \frac{P(i, j)}{P(i)P'(j)} \right) \quad (9)$$

$$E[MI(U, V)] = \sum_{i=1}^{|U|} \sum_{j=1}^{|V|} \sum_{n_{ij}=(a_i+b_j-N)^+}^{\min(a_i, b_j)} \frac{n_{ij}}{N} \log \left( \frac{N n_{ij}}{a_i b_j} \right) \frac{a_i! b_j! (N-a_i)! (N-b_j)!}{N! n_{ij}! (a_i - n_{ij})! (b_j - n_{ij})! (N - a_i - b_j + n_{ij})!} \quad (10)$$

$$AMI = \frac{MI - E[MI]}{\text{mean}(H(U), H(V)) - E[MI]} \quad (11)$$

- Homogeneity, A clustering result satisfies homogeneity if Each cluster contains only members of a single class.

$$h = 1 - \frac{H(C|K)}{H(C)} \quad (12)$$

$$H(C|K) = - \sum_{c=1}^{|C|} \sum_{k=1}^{|K|} \frac{n_{c,k}}{n} \cdot \log \left( \frac{n_{c,k}}{n_k} \right) \quad (13)$$

$$H(C) = - \sum_{c=1}^{|C|} \frac{n_c}{n} \cdot \log \left( \frac{n_c}{n} \right) \quad (14)$$

- Completeness A clustering result satisfies Completeness if All members of a given class are assigned to the same cluster.

$$c = 1 - \frac{H(K|C)}{H(K)} \quad (15)$$

- V-measure Score is the Harmonic mean between homogeneity Score and Completeness Score. It can be used to evaluate the agreement of two independent assignments on the same dataset.

$$v = 2 \cdot \frac{h \cdot c}{h + c} \quad (16)$$

# Results

**Table 1.** NONIEA annotations for EC Level 1 - Molecular Function

| MF(Level 1)                   | purity_score |         | ARI_Score |         | AMI_Score |         | homogeneity_score |         | completeness_score |         | v_measure_score |         | fowlkes_mallows_score |         |
|-------------------------------|--------------|---------|-----------|---------|-----------|---------|-------------------|---------|--------------------|---------|-----------------|---------|-----------------------|---------|
|                               | Mean         | Std-dev | Mean      | Std-dev | Mean      | Std-dev | Mean              | Std-dev | Mean               | Std-dev | Mean            | Std-dev | Mean                  | Std-dev |
| samples * 10                  |              |         |           |         |           |         |                   |         |                    |         |                 |         |                       |         |
| Wang - 50                     | 0.5737       | 0.0673  | 0.3413    | 0.072   | 0.4819    | 0.0724  | 0.4721            | 0.0748  | 0.5218             | 0.0684  | 0.4952          | 0.0704  | 0.4706                | 0.0528  |
| Wang - 100                    | 0.5302       | 0.072   | 0.3105    | 0.0762  | 0.4653    | 0.0737  | 0.4408            | 0.0813  | 0.5101             | 0.0597  | 0.4721          | 0.0725  | 0.4562                | 0.0474  |
| Wang - 150                    | 0.5122       | 0.0701  | 0.2743    | 0.072   | 0.4172    | 0.0685  | 0.394             | 0.077   | 0.4565             | 0.0562  | 0.422           | 0.0678  | 0.428                 | 0.0465  |
| GOGO - 50                     | 0.532        | 0.0611  | 0.3063    | 0.0839  | 0.4585    | 0.0761  | 0.4444            | 0.0794  | 0.5066             | 0.0658  | 0.4729          | 0.0735  | 0.4539                | 0.057   |
| GOGO - 100                    | 0.467        | 0.0598  | 0.2334    | 0.0576  | 0.3866    | 0.0698  | 0.361             | 0.0737  | 0.4378             | 0.0569  | 0.3948          | 0.0684  | 0.4077                | 0.0279  |
| GOGO - 150                    | 0.4713       | 0.0499  | 0.2503    | 0.0597  | 0.4037    | 0.0543  | 0.372             | 0.0613  | 0.456              | 0.0453  | 0.4089          | 0.0537  | 0.4219                | 0.0343  |
| Resnik - 50                   | 0.4343       | 0.154   | 0.2465    | 0.1712  | 0.3732    | 0.2084  | 0.3334            | 0.1951  | 0.5011             | 0.1942  | 0.391           | 0.2001  | 0.4741                | 0.0802  |
| Resnik - 100                  | 0.2422       | 0.0537  | 0.0458    | 0.0795  | 0.0933    | 0.1226  | 0.0781            | 0.096   | 0.1885             | 0.1489  | 0.1073          | 0.1197  | 0.3739                | 0.033   |
| Resnik - 150                  | 0.2071       | 0.0121  | 0.0043    | 0.0026  | 0.0264    | 0.0132  | 0.0236            | 0.0086  | 0.0853             | 0.0243  | 0.0369          | 0.0129  | 0.3547                | 0.005   |
| Lin - 50                      | 0.5083       | 0.063   | 0.295     | 0.0659  | 0.4384    | 0.0749  | 0.4197            | 0.0748  | 0.4945             | 0.0684  | 0.4537          | 0.0723  | 0.4455                | 0.0443  |
| Lin - 100                     | 0.5203       | 0.059   | 0.3365    | 0.0912  | 0.4657    | 0.0784  | 0.4396            | 0.0849  | 0.5144             | 0.0627  | 0.4729          | 0.0768  | 0.4781                | 0.0557  |
| Lin - 150                     | 0.476        | 0.0653  | 0.2877    | 0.0596  | 0.4098    | 0.0669  | 0.3782            | 0.0722  | 0.462              | 0.0542  | 0.4151          | 0.066   | 0.4446                | 0.0339  |
| Baseline - 50                 | 0.5657       | 0.0815  | 0.3413    | 0.0775  | 0.4807    | 0.0943  | 0.471             | 0.099   | 0.5211             | 0.0806  | 0.4938          | 0.0917  | 0.472                 | 0.0506  |
| Baseline - 100                | 0.5128       | 0.0773  | 0.3005    | 0.0904  | 0.4385    | 0.0789  | 0.4154            | 0.0893  | 0.4832             | 0.0641  | 0.4456          | 0.0778  | 0.4528                | 0.0547  |
| Baseline - 150                | 0.4713       | 0.0877  | 0.2463    | 0.1066  | 0.3849    | 0.1051  | 0.3548            | 0.1121  | 0.4369             | 0.0907  | 0.3902          | 0.1038  | 0.4206                | 0.0634  |
| Baseline_LCA - 50             | 0.7597       | 0.0339  | 0.5016    | 0.0631  | 0.5933    | 0.0371  | 0.5925            | 0.0384  | 0.6147             | 0.0346  | 0.6033          | 0.0361  | 0.5907                | 0.0484  |
| Baseline_LCA - 100            | 0.7272       | 0.058   | 0.4855    | 0.0777  | 0.5782    | 0.0443  | 0.5691            | 0.0491  | 0.5986             | 0.0386  | 0.5833          | 0.0437  | 0.5809                | 0.0575  |
| Baseline_LCA - 150            | 0.6959       | 0.0649  | 0.4547    | 0.0807  | 0.5348    | 0.0524  | 0.5248            | 0.0579  | 0.5534             | 0.0453  | 0.5386          | 0.0519  | 0.5548                | 0.058   |
| Baseline+Desc - 50 (0.7,0.3)  | 0.5693       | 0.0376  | 0.3583    | 0.0541  | 0.5       | 0.055   | 0.4942            | 0.0502  | 0.5325             | 0.0601  | 0.5124          | 0.0535  | 0.4775                | 0.0454  |
| Baseline+Desc - 100 (0.7,0.3) | 0.5317       | 0.092   | 0.3217    | 0.1064  | 0.4629    | 0.0991  | 0.444             | 0.1087  | 0.5024             | 0.078   | 0.4697          | 0.0975  | 0.4659                | 0.0606  |
| Baseline+Desc - 150 (0.7,0.3) | 0.552        | 0.0714  | 0.3393    | 0.0879  | 0.4904    | 0.0774  | 0.4658            | 0.0869  | 0.5294             | 0.0621  | 0.4947          | 0.0765  | 0.4812                | 0.0519  |
| GOntoSim - 50(0.7,0.3)        | 0.708        | 0.0767  | 0.4355    | 0.081   | 0.5629    | 0.0728  | 0.5569            | 0.0744  | 0.5922             | 0.067   | 0.5738          | 0.0707  | 0.5425                | 0.0595  |
| GOntoSim - 100 (0.7,0.3)      | 0.7278       | 0.0575  | 0.4849    | 0.0822  | 0.5769    | 0.0551  | 0.5682            | 0.0602  | 0.597              | 0.0484  | 0.582           | 0.0544  | 0.5801                | 0.0609  |
| GOntoSim - 150(0.7,0.3)       | 0.7323       | 0.0648  | 0.5008    | 0.0816  | 0.5858    | 0.0635  | 0.576             | 0.0665  | 0.6032             | 0.0598  | 0.5891          | 0.063   | 0.5924                | 0.0634  |
| Baseline+Desc - 50 (0.5,0.5)  | 0.5533       | 0.0875  | 0.3602    | 0.0998  | 0.4934    | 0.0987  | 0.481             | 0.0978  | 0.5359             | 0.0925  | 0.5066          | 0.0955  | 0.4893                | 0.0731  |
| Baseline+Desc - 100 (0.5,0.5) | 0.5752       | 0.0659  | 0.3843    | 0.07    | 0.5259    | 0.0621  | 0.5031            | 0.0658  | 0.5651             | 0.06    | 0.5318          | 0.0612  | 0.5106                | 0.0511  |
| Baseline+Desc - 150 (0.5,0.5) | 0.5633       | 0.0983  | 0.3697    | 0.1181  | 0.5031    | 0.0974  | 0.4769            | 0.1126  | 0.5451             | 0.0754  | 0.5073          | 0.0964  | 0.5066                | 0.0748  |
| GOntoSim - 50 (0.5,0.5)       | 0.7183       | 0.0776  | 0.475     | 0.1071  | 0.5785    | 0.0717  | 0.5768            | 0.0744  | 0.6019             | 0.0651  | 0.589           | 0.0697  | 0.5705                | 0.0833  |
| GOntoSim - 100 (0.5,0.5)      | 0.7398       | 0.0874  | 0.5034    | 0.1175  | 0.5872    | 0.0718  | 0.5802            | 0.0788  | 0.6053             | 0.0626  | 0.5922          | 0.0708  | 0.596                 | 0.0864  |
| GOntoSim - 150 (0.5,0.5)      | 0.7527       | 0.0761  | 0.5248    | 0.0985  | 0.6023    | 0.0731  | 0.5944            | 0.0769  | 0.6171             | 0.0677  | 0.6055          | 0.0725  | 0.6108                | 0.0769  |

**Table 2.** NONIEA annotations for EC Level 1 - Biological Process

| BP (Level 1)        | purity_score |         | ARI_Score |         | AMI_Score |         | homogeneity_score |         | completeness_score |         | v_measure_score |         | fowlkes_mallows_score |         |
|---------------------|--------------|---------|-----------|---------|-----------|---------|-------------------|---------|--------------------|---------|-----------------|---------|-----------------------|---------|
|                     | Mean         | Std-dev | Mean      | Std-dev | Mean      | Std-dev | Mean              | Std-dev | Mean               | Std-dev | Mean            | Std-dev | Mean                  | Std-dev |
| samples * 10        |              |         |           |         |           |         |                   |         |                    |         |                 |         |                       |         |
| Wang - 50           | 0.281        | 0.0296  | 0.027     | 0.0176  | 0.0685    | 0.0332  | 0.0773            | 0.0264  | 0.1335             | 0.0359  | 0.0976          | 0.0306  | 0.3042                | 0.0133  |
| Wang - 100          | 0.2682       | 0.0346  | 0.0292    | 0.0202  | 0.067     | 0.0282  | 0.0661            | 0.0254  | 0.1092             | 0.0257  | 0.0817          | 0.0266  | 0.3032                | 0.0138  |
| Wang - 150          | 0.2599       | 0.0209  | 0.0249    | 0.0117  | 0.0616    | 0.0184  | 0.0571            | 0.0153  | 0.0959             | 0.0215  | 0.0715          | 0.0179  | 0.3034                | 0.0086  |
| Baseline - 50       | 0.2547       | 0.0151  | 0.0126    | 0.0071  | 0.0551    | 0.0148  | 0.0649            | 0.0117  | 0.1406             | 0.0184  | 0.0884          | 0.0136  | 0.3264                | 0.0124  |
| Baseline - 100      | 0.2488       | 0.0158  | 0.0126    | 0.0048  | 0.0518    | 0.0165  | 0.0513            | 0.0135  | 0.0998             | 0.0188  | 0.0676          | 0.0159  | 0.3151                | 0.0095  |
| Baseline - 150      | 0.2441       | 0.0174  | 0.0103    | 0.0045  | 0.0448    | 0.012   | 0.0417            | 0.0104  | 0.0826             | 0.013   | 0.0552          | 0.0115  | 0.3184                | 0.0133  |
| Baseline_LCA - 50   | 0.322        | 0.0331  | 0.059     | 0.0295  | 0.0946    | 0.0331  | 0.1066            | 0.0315  | 0.1423             | 0.0319  | 0.1211          | 0.0313  | 0.2805                | 0.0219  |
| Baseline_LCA - 100  | 0.2827       | 0.0215  | 0.0396    | 0.0153  | 0.0644    | 0.0191  | 0.0665            | 0.0171  | 0.0959             | 0.0199  | 0.0782          | 0.0183  | 0.2766                | 0.0197  |
| Baseline_LCA - 150  | 0.2894       | 0.0105  | 0.0434    | 0.0136  | 0.0766    | 0.0135  | 0.0718            | 0.0118  | 0.1068             | 0.0163  | 0.0857          | 0.0132  | 0.2865                | 0.0171  |
| Baseline+Desc - 50  | 0.2623       | 0.023   | 0.0128    | 0.0077  | 0.0559    | 0.0251  | 0.0659            | 0.0184  | 0.1364             | 0.0376  | 0.0886          | 0.024   | 0.322                 | 0.0098  |
| Baseline+Desc - 100 | 0.2512       | 0.0229  | 0.0119    | 0.0071  | 0.055     | 0.0231  | 0.0532            | 0.019   | 0.1061             | 0.0262  | 0.0707          | 0.0222  | 0.3212                | 0.0081  |
| Baseline+Desc - 150 | 0.2497       | 0.0143  | 0.0115    | 0.0028  | 0.0558    | 0.0119  | 0.0495            | 0.0091  | 0.1006             | 0.0177  | 0.0662          | 0.0117  | 0.323                 | 0.0087  |
| GOntoSim - 50       | 0.2977       | 0.0235  | 0.0437    | 0.0152  | 0.0781    | 0.0215  | 0.0912            | 0.0194  | 0.1253             | 0.0202  | 0.1052          | 0.0199  | 0.2762                | 0.0175  |
| GOntoSim - 100      | 0.3045       | 0.0237  | 0.0503    | 0.0212  | 0.0846    | 0.0205  | 0.0858            | 0.0195  | 0.1136             | 0.019   | 0.0975          | 0.0197  | 0.275                 | 0.0136  |
| GOntoSim - 150      | 0.2897       | 0.0188  | 0.0396    | 0.0137  | 0.0693    | 0.0157  | 0.0669            | 0.0133  | 0.0947             | 0.0191  | 0.0783          | 0.0156  | 0.272                 | 0.0165  |

**Table 3.** IEA annotations for EC Level 1 - Molecular Function

| MF(Level 1) - IEA            | Purity Score |         | ARI Score |         | AMI Score |         | Homogeneity Score |         | Completeness Score |         | V-Measure Score |         | Fowlkes Mallows Score |         |
|------------------------------|--------------|---------|-----------|---------|-----------|---------|-------------------|---------|--------------------|---------|-----------------|---------|-----------------------|---------|
| samples * 10                 | Mean         | Std-dev | Mean      | Std-dev | Mean      | Std-dev | Mean              | Std-dev | Mean               | Std-dev | Mean            | Std-dev | Mean                  | Std-dev |
| Wang - 50                    | 0.6447       | 0.0723  | 0.4268    | 0.0797  | 0.5602    | 0.0659  | 0.5392            | 0.0776  | 0.6107             | 0.0562  | 0.5712          | 0.0641  | 0.5438                | 0.0531  |
| Wang - 100                   | 0.6357       | 0.0864  | 0.4536    | 0.126   | 0.5733    | 0.1099  | 0.5397            | 0.1127  | 0.6263             | 0.1039  | 0.5786          | 0.1083  | 0.5702                | 0.0899  |
| Wang - 150                   | 0.602        | 0.0735  | 0.4026    | 0.0925  | 0.5292    | 0.0926  | 0.4936            | 0.095   | 0.5831             | 0.096   | 0.5332          | 0.0917  | 0.5302                | 0.0688  |
| Wang - 250                   | 0.5731       | 0.0844  | 0.4023    | 0.0792  | 0.5475    | 0.0904  | 0.4844            | 0.0928  | 0.6423             | 0.0968  | 0.5498          | 0.0899  | 0.549                 | 0.0551  |
| Wang - 400                   | 0.4764       | 0.1176  | 0.246     | 0.1338  | 0.3896    | 0.1381  | 0.3336            | 0.1475  | 0.4979             | 0.1048  | 0.3918          | 0.1374  | 0.454                 | 0.0707  |
| Wang - 500                   | 0.4805       | 0.1236  | 0.2544    | 0.1436  | 0.3911    | 0.153   | 0.3283            | 0.1466  | 0.5111             | 0.1438  | 0.3929          | 0.1524  | 0.4668                | 0.0778  |
| GOGO - 50                    | 0.708        | 0.0587  | 0.5216    | 0.09    | 0.6363    | 0.0714  | 0.6312            | 0.0755  | 0.6606             | 0.0636  | 0.6454          | 0.0695  | 0.6086                | 0.0699  |
| GOGO - 100                   | 0.6908       | 0.0577  | 0.5129    | 0.0788  | 0.6213    | 0.0642  | 0.5999            | 0.0671  | 0.6552             | 0.0617  | 0.626           | 0.0634  | 0.6061                | 0.0614  |
| GOGO - 150                   | 0.5378       | 0.1022  | 0.3237    | 0.1124  | 0.4634    | 0.1256  | 0.4211            | 0.1267  | 0.533              | 0.1132  | 0.4682          | 0.1241  | 0.4835                | 0.0732  |
| GOGO - 250                   | 0.5402       | 0.0822  | 0.3195    | 0.105   | 0.4586    | 0.1071  | 0.414             | 0.1071  | 0.5248             | 0.1082  | 0.4615          | 0.1064  | 0.4787                | 0.071   |
| GOGO - 400                   | 0.4602       | 0.0629  | 0.2515    | 0.087   | 0.3826    | 0.0848  | 0.3198            | 0.086   | 0.4887             | 0.0789  | 0.3847          | 0.0845  | 0.4504                | 0.0554  |
| GOGO - 500                   | 0.4873       | 0.0759  | 0.2587    | 0.0853  | 0.3987    | 0.1125  | 0.3394            | 0.1038  | 0.4933             | 0.122   | 0.4003          | 0.1121  | 0.4517                | 0.0563  |
| Resnik - 500                 | 0.7039       | 0.0743  | 0.621     | 0.1018  | 0.7782    | 0.0522  | 0.6993            | 0.0747  | 0.8827             | 0.0252  | 0.7788          | 0.052   | 0.7244                | 0.0648  |
| Lin - 500                    | 0.8197       | 0.0074  | 0.7863    | 0.0176  | 0.8797    | 0.0171  | 0.8281            | 0.0166  | 0.939              | 0.0182  | 0.88            | 0.0171  | 0.835                 | 0.014   |
| Baseline - 50                | 0.6957       | 0.0706  | 0.5146    | 0.0974  | 0.6358    | 0.068   | 0.6205            | 0.0802  | 0.6741             | 0.0543  | 0.6449          | 0.066   | 0.6088                | 0.0678  |
| Baseline - 100               | 0.669        | 0.0559  | 0.4799    | 0.0738  | 0.6196    | 0.0836  | 0.5812            | 0.0693  | 0.676              | 0.1048  | 0.6244          | 0.0826  | 0.5899                | 0.0645  |
| Baseline - 150               | 0.6241       | 0.0521  | 0.4261    | 0.0788  | 0.5897    | 0.0706  | 0.5359            | 0.0716  | 0.6662             | 0.0715  | 0.5932          | 0.0699  | 0.5587                | 0.0609  |
| Baseline - 250               | 0.6507       | 0.0884  | 0.4654    | 0.1414  | 0.6029    | 0.1226  | 0.5522            | 0.1257  | 0.6706             | 0.1142  | 0.6049          | 0.122   | 0.5874                | 0.1053  |
| Baseline - 400               | 0.6324       | 0.0801  | 0.4452    | 0.0994  | 0.5822    | 0.0891  | 0.5322            | 0.0993  | 0.6491             | 0.0698  | 0.5835          | 0.0888  | 0.5715                | 0.0669  |
| Baseline - 500               | 0.6512       | 0.0514  | 0.4833    | 0.0656  | 0.6116    | 0.0549  | 0.5618            | 0.0586  | 0.6756             | 0.0591  | 0.6126          | 0.0548  | 0.5971                | 0.0485  |
| Baseline_LCA - 50            | 0.8397       | 0.0763  | 0.6977    | 0.1099  | 0.785     | 0.0467  | 0.7647            | 0.0662  | 0.8201             | 0.0315  | 0.7903          | 0.0455  | 0.7599                | 0.0792  |
| Baseline_LCA - 100           | 0.8103       | 0.033   | 0.6406    | 0.0591  | 0.7446    | 0.0373  | 0.7228            | 0.0339  | 0.7753             | 0.0481  | 0.7477          | 0.0369  | 0.7105                | 0.0476  |
| Baseline_LCA - 150           | 0.792        | 0.078   | 0.6515    | 0.1345  | 0.7678    | 0.0734  | 0.7311            | 0.0878  | 0.8147             | 0.0573  | 0.7698          | 0.0727  | 0.729                 | 0.0971  |
| Baseline_LCA - 250           | 0.8187       | 0.0671  | 0.7105    | 0.0982  | 0.7954    | 0.0506  | 0.7594            | 0.0681  | 0.8386             | 0.0319  | 0.7964          | 0.0504  | 0.7729                | 0.0729  |
| Baseline_LCA - 400           | 0.8753       | 0.0796  | 0.7687    | 0.1265  | 0.8177    | 0.063   | 0.8011            | 0.0777  | 0.8375             | 0.0508  | 0.8183          | 0.0628  | 0.8141                | 0.0979  |
| Baseline_LCA - 500           | 0.8223       | 0.0758  | 0.6911    | 0.1346  | 0.7776    | 0.0764  | 0.7465            | 0.0894  | 0.8142             | 0.0659  | 0.7781          | 0.0762  | 0.7558                | 0.1021  |
| Desc-50(0.7,0.3)             | 0.718        | 0.0607  | 0.5302    | 0.0772  | 0.6566    | 0.0612  | 0.6406            | 0.0669  | 0.6929             | 0.0532  | 0.6653          | 0.0594  | 0.6216                | 0.0576  |
| Baseline+Desc - 100(0.7,0.3) | 0.6813       | 0.0485  | 0.5037    | 0.077   | 0.6357    | 0.0677  | 0.593             | 0.0699  | 0.6966             | 0.0623  | 0.6403          | 0.0667  | 0.611                 | 0.0566  |
| Baseline+Desc - 150(0.7,0.3) | 0.7228       | 0.1034  | 0.5651    | 0.1486  | 0.6781    | 0.1115  | 0.64              | 0.128   | 0.7317             | 0.0869  | 0.6808          | 0.1105  | 0.6605                | 0.1031  |
| Baseline+Desc - 250(0.7,0.3) | 0.7157       | 0.0733  | 0.5864    | 0.0896  | 0.7079    | 0.0684  | 0.6537            | 0.0792  | 0.7779             | 0.0569  | 0.7094          | 0.068   | 0.6793                | 0.0633  |
| Baseline+Desc - 400(0.7,0.3) | 0.678        | 0.1062  | 0.547     | 0.1387  | 0.682     | 0.1207  | 0.6163            | 0.1289  | 0.7734             | 0.1053  | 0.6831          | 0.1203  | 0.6603                | 0.0906  |
| Baseline+Desc - 500(0.7,0.3) | 0.6691       | 0.0812  | 0.5269    | 0.1232  | 0.6552    | 0.0977  | 0.5966            | 0.1067  | 0.7322             | 0.0854  | 0.6561          | 0.0974  | 0.6372                | 0.0888  |
| GOntoSim - 50(0.7,0.3)       | 0.8063       | 0.051   | 0.6498    | 0.0587  | 0.7564    | 0.0386  | 0.7339            | 0.0446  | 0.7946             | 0.0402  | 0.7625          | 0.0376  | 0.7194                | 0.0437  |
| GOntoSim - 100(0.7,0.3)      | 0.8002       | 0.0698  | 0.6288    | 0.1155  | 0.7516    | 0.0579  | 0.7233            | 0.0712  | 0.7906             | 0.0452  | 0.7548          | 0.0571  | 0.707                 | 0.0853  |
| GOntoSim - 150(0.7,0.3)      | 0.8041       | 0.0812  | 0.657     | 0.1321  | 0.7699    | 0.07    | 0.7385            | 0.0867  | 0.8099             | 0.0512  | 0.7718          | 0.0694  | 0.7311                | 0.098   |
| GOntoSim - 250(0.7,0.3)      | 0.806        | 0.073   | 0.6603    | 0.1208  | 0.7697    | 0.0637  | 0.7391            | 0.0775  | 0.8067             | 0.0499  | 0.7709          | 0.0634  | 0.7323                | 0.0909  |
| GOntoSim - 400(0.7,0.3)      | 0.8898       | 0.0883  | 0.7975    | 0.1355  | 0.8533    | 0.0724  | 0.8359            | 0.0939  | 0.8743             | 0.0496  | 0.8537          | 0.0722  | 0.8387                | 0.1032  |
| GOntoSim - 500(0.7,0.3)      | 0.8229       | 0.0654  | 0.703     | 0.0914  | 0.8022    | 0.0455  | 0.7704            | 0.0593  | 0.8393             | 0.0376  | 0.8027          | 0.0454  | 0.7645                | 0.0693  |
| Baseline+Desc - 50(0.5,0.5)  | 0.7927       | 0.1196  | 0.6347    | 0.17    | 0.7322    | 0.1323  | 0.7215            | 0.1389  | 0.7581             | 0.1172  | 0.7389          | 0.1288  | 0.7041                | 0.1328  |
| Baseline+Desc - 100(0.5,0.5) | 0.7293       | 0.0823  | 0.5659    | 0.1051  | 0.6772    | 0.0719  | 0.6498            | 0.0833  | 0.7178             | 0.06    | 0.6812          | 0.0709  | 0.655                 | 0.0766  |
| Baseline+Desc - 150(0.5,0.5) | 0.6856       | 0.0961  | 0.5184    | 0.1229  | 0.6529    | 0.0949  | 0.6077            | 0.1079  | 0.7178             | 0.082   | 0.6559          | 0.0939  | 0.6288                | 0.0804  |
| Baseline+Desc - 250(0.5,0.5) | 0.7          | 0.0764  | 0.5489    | 0.1137  | 0.685     | 0.0793  | 0.6352            | 0.0883  | 0.7491             | 0.0648  | 0.6866          | 0.0788  | 0.6506                | 0.08    |
| Baseline+Desc - 400(0.5,0.5) | 0.6765       | 0.0927  | 0.5566    | 0.1224  | 0.6988    | 0.0988  | 0.6318            | 0.1134  | 0.7908             | 0.0831  | 0.6998          | 0.0984  | 0.667                 | 0.0841  |
| Baseline+Desc - 500(0.5,0.5) | 0.7135       | 0.1094  | 0.6119    | 0.1445  | 0.7262    | 0.1171  | 0.6693            | 0.1314  | 0.802              | 0.0878  | 0.7269          | 0.1168  | 0.7053                | 0.0937  |
| GOntoSim - 50(0.5,0.5)       | 0.8537       | 0.0439  | 0.6961    | 0.0861  | 0.7892    | 0.0599  | 0.778             | 0.0611  | 0.8122             | 0.0604  | 0.7944          | 0.0584  | 0.7523                | 0.069   |
| GOntoSim - 100(0.5,0.5)      | 0.7763       | 0.0682  | 0.5941    | 0.1328  | 0.7316    | 0.0906  | 0.6982            | 0.0953  | 0.777              | 0.0856  | 0.735           | 0.0894  | 0.6816                | 0.1003  |
| GOntoSim - 150(0.5,0.5)      | 0.8007       | 0.0575  | 0.6645    | 0.096   | 0.7829    | 0.0577  | 0.7472            | 0.0659  | 0.8272             | 0.0507  | 0.7848          | 0.0572  | 0.7369                | 0.071   |
| GOntoSim - 250(0.5,0.5)      | 0.8416       | 0.0938  | 0.72      | 0.1529  | 0.8129    | 0.0823  | 0.7847            | 0.1024  | 0.8475             | 0.0613  | 0.8138          | 0.0819  | 0.7801                | 0.1156  |
| GOntoSim - 400(0.5,0.5)      | 0.839        | 0.0736  | 0.7446    | 0.1045  | 0.8298    | 0.058   | 0.7974            | 0.0741  | 0.8676             | 0.0442  | 0.8303          | 0.0578  | 0.7986                | 0.0796  |
| GOntoSim - 500(0.5,0.5)      | 0.9424       | 0.0671  | 0.9052    | 0.0855  | 0.9266    | 0.0478  | 0.9154            | 0.0648  | 0.9398             | 0.0348  | 0.9268          | 0.0477  | 0.924                 | 0.0658  |

**Table 4.** NONIEA annotations for EC Level 1 - Molecular Function - with Tanimoto Coefficient

| MF(Level 1)                      | purity_score |         | ARI Score |         | AMI Score |         | homogeneity_score |         | completeness_score |         | v_measure_score |         | fowlkes_mallows_score |         |
|----------------------------------|--------------|---------|-----------|---------|-----------|---------|-------------------|---------|--------------------|---------|-----------------|---------|-----------------------|---------|
|                                  | Mean         | Std-dev | Mean      | Std-dev | Mean      | Std-dev | Mean              | Std-dev | Mean               | Std-dev | Mean            | Std-dev | Mean                  | Std-dev |
| samples * 10                     |              |         |           |         |           |         |                   |         |                    |         |                 |         |                       |         |
| Baseline - 50                    | 0.5657       | 0.0815  | 0.3413    | 0.0775  | 0.4807    | 0.0943  | 0.471             | 0.099   | 0.5211             | 0.0806  | 0.4938          | 0.0917  | 0.472                 | 0.0506  |
| Baseline - 100                   | 0.5128       | 0.0773  | 0.3005    | 0.0904  | 0.4385    | 0.0789  | 0.4154            | 0.0893  | 0.4832             | 0.0641  | 0.4456          | 0.0778  | 0.4528                | 0.0547  |
| Baseline - 150                   | 0.4713       | 0.0877  | 0.2463    | 0.1066  | 0.3849    | 0.1051  | 0.3548            | 0.1121  | 0.4369             | 0.0907  | 0.3902          | 0.1038  | 0.4206                | 0.0634  |
| Baseline_TC - 150                | 0.4986       | 0.0896  | 0.284     | 0.1047  | 0.4189    | 0.0894  | 0.3874            | 0.1019  | 0.4734             | 0.0684  | 0.4239          | 0.0884  | 0.4502                | 0.0607  |
| Baseline_LCA - 50                | 0.7597       | 0.0339  | 0.5016    | 0.0631  | 0.5933    | 0.0371  | 0.5925            | 0.0384  | 0.6147             | 0.0346  | 0.6033          | 0.0361  | 0.5907                | 0.0484  |
| Baseline_LCA - 100               | 0.7272       | 0.058   | 0.4855    | 0.0777  | 0.5782    | 0.0443  | 0.5691            | 0.0491  | 0.5986             | 0.0386  | 0.5833          | 0.0437  | 0.5809                | 0.0575  |
| Baseline_LCA - 150               | 0.6959       | 0.0649  | 0.4547    | 0.0807  | 0.5348    | 0.0524  | 0.5248            | 0.0579  | 0.5534             | 0.0453  | 0.5386          | 0.0519  | 0.5558                | 0.058   |
| Baseline+Desc - 50 (0.7,0.3)     | 0.5693       | 0.0376  | 0.3583    | 0.0541  | 0.5       | 0.055   | 0.4942            | 0.0502  | 0.5325             | 0.0601  | 0.5124          | 0.0535  | 0.4775                | 0.0454  |
| Baseline+Desc - 100 (0.7,0.3)    | 0.5317       | 0.092   | 0.3217    | 0.1064  | 0.4629    | 0.0991  | 0.444             | 0.1087  | 0.5024             | 0.078   | 0.4697          | 0.0975  | 0.4659                | 0.0606  |
| Baseline+Desc - 150 (0.7,0.3)    | 0.552        | 0.0714  | 0.3393    | 0.0879  | 0.4904    | 0.0774  | 0.4658            | 0.0869  | 0.5294             | 0.0621  | 0.4947          | 0.0765  | 0.4812                | 0.0519  |
| Baseline+Desc_TC - 150 (0.7,0.3) | 0.547        | 0.0443  | 0.3477    | 0.0546  | 0.4848    | 0.0535  | 0.4594            | 0.0582  | 0.5238             | 0.0473  | 0.4891          | 0.0529  | 0.4854                | 0.0332  |
| GOntoSim - 50 (0.7,0.3)          | 0.708        | 0.0767  | 0.4355    | 0.081   | 0.5629    | 0.0728  | 0.5569            | 0.0744  | 0.5922             | 0.067   | 0.5738          | 0.0707  | 0.5425                | 0.0595  |
| GOntoSim - 100 (0.7,0.3)         | 0.7278       | 0.0575  | 0.4849    | 0.0822  | 0.5769    | 0.0551  | 0.5682            | 0.0602  | 0.597              | 0.0484  | 0.582           | 0.0544  | 0.5801                | 0.0609  |
| GOntoSim - 150 (0.7,0.3)         | 0.7323       | 0.0648  | 0.5008    | 0.0816  | 0.5858    | 0.0635  | 0.576             | 0.0665  | 0.6032             | 0.0598  | 0.5891          | 0.063   | 0.5924                | 0.0634  |
| GOntoSim_TC - 150 (0.7,0.3)      | 0.7056       | 0.0816  | 0.4718    | 0.0998  | 0.5737    | 0.0669  | 0.5592            | 0.0736  | 0.5967             | 0.058   | 0.5771          | 0.0662  | 0.5733                | 0.0738  |
| Baseline+Desc - 50 (0.5,0.5)     | 0.5533       | 0.0875  | 0.3602    | 0.0998  | 0.4934    | 0.0987  | 0.481             | 0.0978  | 0.5359             | 0.0925  | 0.5066          | 0.0955  | 0.4893                | 0.0731  |
| Baseline+Desc - 100 (0.5,0.5)    | 0.5752       | 0.0659  | 0.3843    | 0.07    | 0.5259    | 0.0621  | 0.5031            | 0.0658  | 0.5651             | 0.06    | 0.5318          | 0.0612  | 0.5106                | 0.0511  |
| Baseline+Desc - 150 (0.5,0.5)    | 0.5633       | 0.0983  | 0.3697    | 0.1181  | 0.5031    | 0.0974  | 0.4769            | 0.1126  | 0.5451             | 0.0754  | 0.5073          | 0.0964  | 0.5066                | 0.0748  |
| Baseline+Desc_TC - 150 (0.5,0.5) | 0.5439       | 0.0493  | 0.3345    | 0.0688  | 0.4679    | 0.0571  | 0.4417            | 0.0638  | 0.51               | 0.0534  | 0.4724          | 0.0566  | 0.4776                | 0.0434  |
| GOntoSim - 50 (0.5,0.5)          | 0.7183       | 0.0776  | 0.475     | 0.1071  | 0.5785    | 0.0717  | 0.5768            | 0.0744  | 0.6019             | 0.0651  | 0.589           | 0.0697  | 0.5705                | 0.0833  |
| GOntoSim - 100 (0.5,0.5)         | 0.7398       | 0.0874  | 0.5034    | 0.1175  | 0.5872    | 0.0718  | 0.5802            | 0.0788  | 0.6053             | 0.0626  | 0.5922          | 0.0708  | 0.596                 | 0.0864  |
| GOntoSim - 150 (0.5,0.5)         | 0.7527       | 0.0761  | 0.5248    | 0.0985  | 0.6023    | 0.0731  | 0.5944            | 0.0769  | 0.6171             | 0.0677  | 0.6055          | 0.0725  | 0.6108                | 0.0769  |
| GOntoSim_TC - 150 (0.5,0.5)      | 0.7438       | 0.0966  | 0.518     | 0.1412  | 0.6022    | 0.0903  | 0.5919            | 0.0977  | 0.6201             | 0.0803  | 0.6054          | 0.0895  | 0.609                 | 0.1065  |

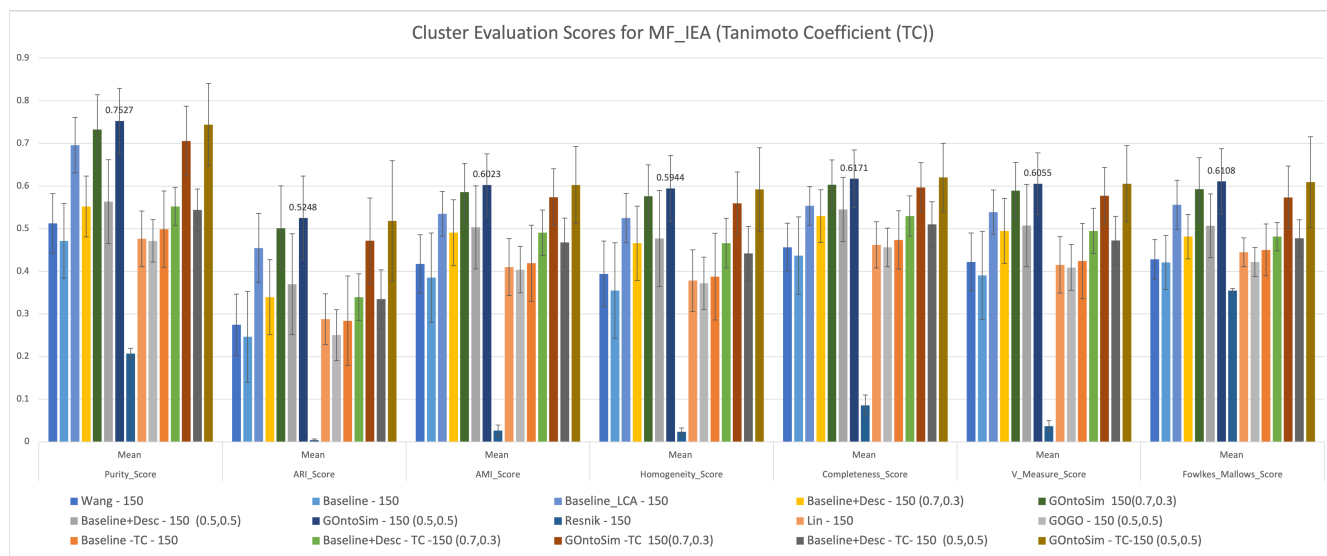

**Figure 1.** Cluster Evaluation at EC Level 1 for MF annotations (NONIEA). Baseline, Baseline+Desc, and GOntoSim Methods implemented with Tanimoto Coefficient to check for optimizations.

**Table 5.** IEA annotations for EC Level 1 - Molecular Function - with Tanimoto Coefficient

| MF(Level 1)                      | purity_score |         | ARI Score |         | AMI Score |         | homogeneity_score |         | completeness_score |         | v_measure_score |         | fowlkes_mallows_score |         |
|----------------------------------|--------------|---------|-----------|---------|-----------|---------|-------------------|---------|--------------------|---------|-----------------|---------|-----------------------|---------|
|                                  | Mean         | Std-dev | Mean      | Std-dev | Mean      | Std-dev | Mean              | Std-dev | Mean               | Std-dev | Mean            | Std-dev | Mean                  | Std-dev |
| Wang - 500                       | 0.4805       | 0.1236  | 0.2544    | 0.1436  | 0.3911    | 0.153   | 0.3283            | 0.1466  | 0.5111             | 0.1438  | 0.3929          | 0.1524  | 0.4668                | 0.0778  |
| GOGO - 500                       | 0.4873       | 0.0759  | 0.2587    | 0.0853  | 0.3987    | 0.1125  | 0.3394            | 0.1038  | 0.4933             | 0.122   | 0.4003          | 0.1121  | 0.4517                | 0.0563  |
| Resnik - 500                     | 0.7039       | 0.0743  | 0.621     | 0.1018  | 0.7782    | 0.0522  | 0.6993            | 0.0747  | 0.8827             | 0.0252  | 0.7788          | 0.052   | 0.7244                | 0.0648  |
| Lin - 500                        | 0.8197       | 0.0074  | 0.7863    | 0.0176  | 0.8797    | 0.0171  | 0.8281            | 0.0166  | 0.939              | 0.0182  | 0.88            | 0.0171  | 0.835                 | 0.014   |
| Baseline - 500                   | 0.6512       | 0.0514  | 0.4833    | 0.0656  | 0.6116    | 0.0549  | 0.5618            | 0.0586  | 0.6756             | 0.0591  | 0.6126          | 0.0548  | 0.5971                | 0.0485  |
| Baseline_TC - 500                | 0.4763       | 0.1116  | 0.2753    | 0.1088  | 0.3909    | 0.1075  | 0.3405            | 0.1145  | 0.4699             | 0.0902  | 0.3926          | 0.107   | 0.4594                | 0.0644  |
| GOntoSim - 500(0.7,0.3)          | 0.8229       | 0.0654  | 0.703     | 0.0914  | 0.8022    | 0.0455  | 0.7704            | 0.0593  | 0.8393             | 0.0376  | 0.8027          | 0.0454  | 0.7645                | 0.0693  |
| GOntoSim_TC - 500                | 0.9221       | 0.0666  | 0.839     | 0.12    | 0.8726    | 0.0705  | 0.8655            | 0.0815  | 0.881              | 0.0593  | 0.8729          | 0.0704  | 0.8689                | 0.0944  |
| GOntoSim - 500(0.5,0.5)          | 0.9424       | 0.0671  | 0.9052    | 0.0855  | 0.9266    | 0.0478  | 0.9154            | 0.0648  | 0.9398             | 0.0348  | 0.9268          | 0.0477  | 0.924                 | 0.0658  |
| GOntoSim_TC - 500 (0.5,0.5)      | 0.8531       | 0.0568  | 0.7836    | 0.0677  | 0.8653    | 0.034   | 0.8335            | 0.0467  | 0.9014             | 0.0307  | 0.8656          | 0.034   | 0.8291                | 0.0507  |
| Baseline_LCA - 500               | 0.8223       | 0.0758  | 0.6911    | 0.1346  | 0.7776    | 0.0764  | 0.7465            | 0.0894  | 0.8142             | 0.0659  | 0.7781          | 0.0762  | 0.7558                | 0.1021  |
| Baseline+Desc - 500(0.7,0.3)     | 0.6691       | 0.0812  | 0.5269    | 0.1232  | 0.6552    | 0.0977  | 0.5966            | 0.1067  | 0.7322             | 0.0854  | 0.6561          | 0.0974  | 0.6372                | 0.0888  |
| Baseline+Desc_TC - 500(0.7,0.3)  | 0.8229       | 0.0654  | 0.703     | 0.0914  | 0.8022    | 0.0455  | 0.7704            | 0.0593  | 0.8393             | 0.0376  | 0.8027          | 0.0454  | 0.7645                | 0.0693  |
| Baseline+Desc - 500(0.5,0.5)     | 0.7135       | 0.1094  | 0.6119    | 0.1445  | 0.7262    | 0.1171  | 0.6693            | 0.1314  | 0.802              | 0.0878  | 0.7269          | 0.1168  | 0.7053                | 0.0937  |
| Baseline+Desc_TC - 500 (0.5,0.5) | 0.5461       | 0.1032  | 0.3233    | 0.1109  | 0.453     | 0.1178  | 0.4085            | 0.1205  | 0.5168             | 0.1057  | 0.4544          | 0.1174  | 0.4852                | 0.065   |

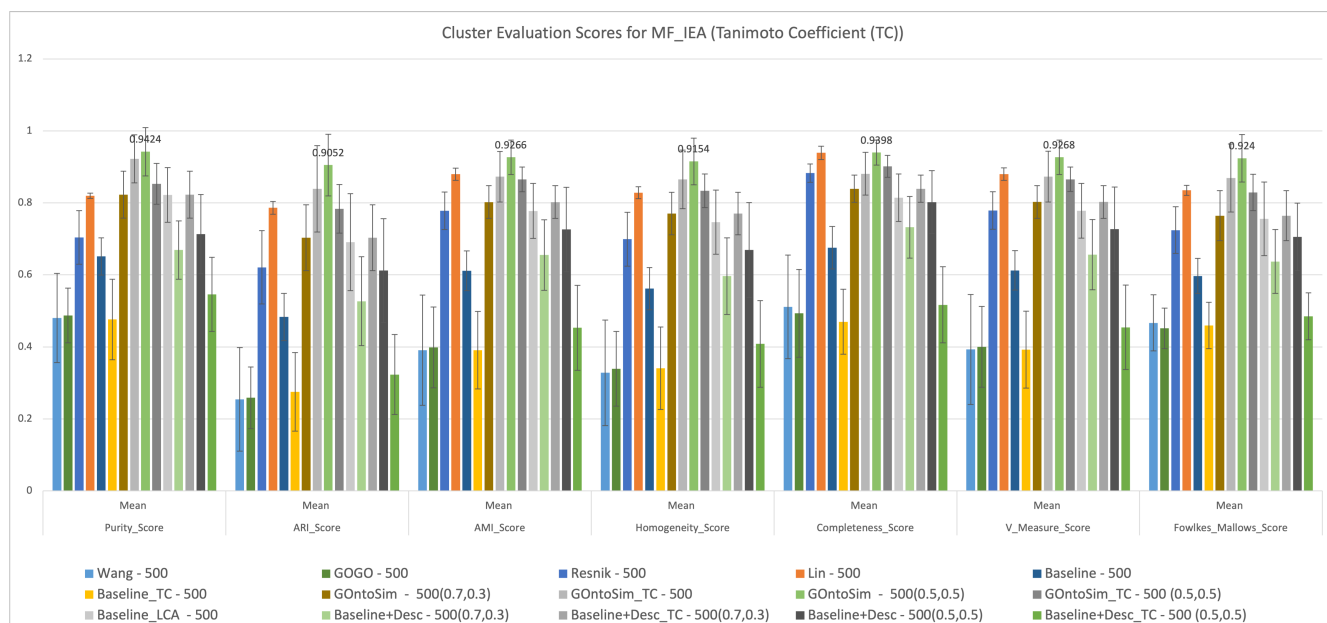

**Figure 2.** Cluster Evaluation at EC Level 1 for MF annotations (IEA). Baseline, Baseline+Desc, and GOntoSim Methods implemented with Tanimoto Coefficient to check for optimizations.
